# Supplementary material for: Cell-type-specific Alzheimer’s disease polygenic risk scores are associated with distinct disease processes in Alzheimer’s disease
Source: PubMed Central journal article supplement (PMC10689816; doi:10.1038/s41467-023-43132-2), 2023-11-30
Supplement: 41467_2023_43132_MOESM1_ESM.pdf [file 41467_2023_43132_MOESM1_ESM.pdf]

**Supplementary materials to:**

Cell-type-specific Alzheimer's disease polygenic risk scores are associated with distinct disease processes in Alzheimer's disease

Hyun-Sik Yang<sup>1,2,3,4,\*</sup>, Ling Teng<sup>1,4</sup>, Daniel Kang<sup>2</sup>, Vilas Menon<sup>5,6</sup>, Tian Ge<sup>3,4,7,8</sup>, Hilary K. Finucane<sup>3,4,9</sup>, Aaron P. Schultz<sup>2,3</sup>, Michael Properzi<sup>2</sup>, Hans-Ulrich Klein<sup>5,6</sup>, Lori B. Chibnik<sup>2,4,10</sup>, Julie A. Schneider<sup>11</sup>, David A. Bennett<sup>11</sup>, Timothy J. Hohman<sup>12</sup>, Richard P. Mayeux<sup>6</sup>, Keith A. Johnson<sup>1,2,3,13</sup>, Philip L. De Jager<sup>5,6</sup>, Reisa A. Sperling<sup>1,2,3</sup>

<sup>1</sup>Center for Alzheimer Research and Treatment, Department of Neurology, Brigham and Women's Hospital, Boston, MA, USA

<sup>2</sup>Department of Neurology, Massachusetts General Hospital, Boston, MA, USA

<sup>3</sup>Harvard Medical School, Boston, MA

<sup>4</sup>Broad Institute of MIT and Harvard, Cambridge, MA

<sup>5</sup>Center for Translational & Computational Neuroimmunology, Department of Neurology, Columbia University Irving Medical Center, New York, NY, USA

<sup>6</sup>Department of Neurology and the Taub Institute for the Study of Alzheimer's Disease and the Aging Brain, Columbia University Irving Medical Center, New York, NY, USA

<sup>7</sup>Psychiatric and Neurodevelopmental Genetics Unit, Center for Genomic Medicine, Massachusetts General Hospital, Boston, MA.

<sup>8</sup>Center for Precision Psychiatry, Department of Psychiatry, Massachusetts General Hospital, Boston, MA, USA

<sup>9</sup>Department of Medicine, Massachusetts General Hospital, Boston, MA, USA

<sup>10</sup>Department of Epidemiology, Harvard T.H. Chan School of Public Health, Boston, MA, USA

<sup>11</sup>Rush Alzheimer's Disease Center, Rush University Medical Center, Chicago, IL, USA

<sup>12</sup>Department of Neurology, Vanderbilt University Medical Center, Nashville, TN, USA

<sup>13</sup>Department of Radiology, Massachusetts General Hospital, Boston, MA, USA

\*Corresponding Author: Hyun-Sik Yang, MD

E-mail: [hyang18@bwh.harvard.edu](mailto:hyang18@bwh.harvard.edu)

| Cell type        | N_SNP_ROSMAP (%) | N_SNP_A4 (%)    | N_SNP_HRC (%)   | N_SNP_PRSet (%) |
|------------------|------------------|-----------------|-----------------|-----------------|
| Ex               | 78555 (7.6)      | 81405 (7.6)     | 445321 (6.8)    | 20283 (10.7)    |
| In               | 101104 (9.7)     | 104006 (9.7)    | 578298 (8.8)    | 25334 (13.3)    |
| Ast              | 82828 (8.0)      | 85708 (8.0)     | 458050 (7.0)    | 21729 (11.4)    |
| Mic              | 71283 (6.9)      | 74069 (6.9)     | 401171 (6.1)    | 19158 (10.1)    |
| Oli              | 82719 (8.0)      | 85342 (8.0)     | 473174 (7.2)    | 20452 (10.8)    |
| Opc              | 108157 (10.4)    | 111476 (10.4)   | 609520 (9.3)    | 26966 (14.2)    |
| All <sup>a</sup> | 1039252 (100.0)  | 1067306 (100.0) | 6569519 (100.0) | 190005 (100.0)  |

**Supplementary Table 1. Number of SNPs included in each cell-type-specific ADPRS.** The number and proportion of the post-LD shrinkage SNPs (i.e., PRS-CS-processed SNPs) included in each cell-type-specific ADPRS are shown for ROSMAP (N\_SNP\_ROSMAP) and A4 (N\_SNP\_A4). Each cell-type-specific ADPRS includes SNPs within cell-type-specific genomic regions (1,343 cell-type-specific genes per each cell type  $\pm$  30 kb margins). While the exact numbers of N\_SNP\_ROSMAP and N\_SNP\_A4 are slightly different (<5% difference due to genotype missingness in each dataset), the proportions of SNPs included in each cell-type-specific ADPRS were highly consistent. For comparison, total HRC-imputed SNP count before LD shrinkage (N\_SNP\_HRC) and after LD pruning (N\_SNP\_PRSet, p-value threshold=1) are also shown for the ROSMAP genotype data. Although LD shrinkage using PRS-CS was limited to the HapMap3 SNPs (N\_SNP\_ROSMAP and N\_SNP\_A4), it retains more SNPs with posterior effect sizes than the LD pruning approach (N\_SNP\_PRSet). <sup>a</sup>All autosomal SNPs excluding the *APOE* region.

|                                      | Mean (s.d.)    | N_nonmissing |
|--------------------------------------|----------------|--------------|
| AD dementia, n (%)                   | 538 (68.4)     | 786          |
| Amyloid- $\beta$ (A $\beta$ ) (sqrt) | 1.7 (1.1)      | 1381         |
| Diffuse plaque (DP) (sqrt)           | 0.71 (0.49)    | 1452         |
| Neuritic plaque (NP) (sqrt)          | 0.77 (0.53)    | 1452         |
| PHFtau (sqrt)                        | 2.3 (1.4)      | 1451         |
| Neurofibrillary tangle (NFT) (sqrt)  | 0.70 (0.43)    | 1452         |
| Cognitive decline                    | -0.017 (0.094) | 1374         |

**Supplementary Table 2. AD endophenotypes tested in ROSMAP.** The mean and standard deviation (s.d.) of the AD endophenotypes tested for their associations with cell-type-specific ADPRSs in ROSMAP are shown. For AD dementia (binary trait), we indicated the number of cases and the proportion out of the case (AD dementia) + control (cognitively unimpaired, no AD pathology) subset used for the analyses with AD dementia as the outcome (n=786). Abbreviations: N\_nonmissing, number of participants with non-missing data; sqrt, square root-transformed values

| Model                    | OR          | 95% CI              | z-value     | p-value                                | FDR                                    | $\Delta R^2$ |
|--------------------------|-------------|---------------------|-------------|----------------------------------------|----------------------------------------|--------------|
| <b>All</b>               | <b>1.53</b> | <b>1.28 to 1.85</b> | <b>4.52</b> | <b><math>6.2 \times 10^{-6}</math></b> | <b><math>3.4 \times 10^{-5}</math></b> | <b>0.028</b> |
| Ex                       | 1.04        | 0.87 to 1.24        | 0.44        | 0.66                                   | 0.68                                   | NA           |
| In                       | 1.11        | 0.92 to 1.35        | 1.12        | 0.26                                   | 0.35                                   | NA           |
| Ast                      | 1.18        | 0.98 to 1.42        | 1.74        | 0.082                                  | 0.13                                   | NA           |
| <b>Mic</b>               | <b>1.45</b> | <b>1.20 to 1.75</b> | <b>3.86</b> | <b><math>1.1 \times 10^{-4}</math></b> | <b><math>3.9 \times 10^{-4}</math></b> | <b>0.020</b> |
| Oli                      | 1.26        | 1.05 to 1.51        | 2.47        | 0.014                                  | 0.030                                  | NA           |
| Opc                      | 1.05        | 0.88 to 1.25        | 0.54        | 0.59                                   | 0.64                                   | NA           |
| <i>APOE</i> $\epsilon 4$ | 6.81        | 4.31 to 11.2        | 7.88        | $3.3 \times 10^{-15}$                  | NA                                     | 0.12         |
| <i>APOE</i> $\epsilon 2$ | 0.38        | 0.24 to 0.60        | -4.17       | $3.1 \times 10^{-5}$                   | NA                                     | 0.023        |

**Supplementary Table 3. Association between cell-type-specific ADPRS and AD dementia in ROSMAP (case: n=538, control: n=248).** OR (odds ratio) of AD dementia per 1 s.d. increase in ADPRS is shown. ADPRS models (logistic regression) were adjusted for *APOE*  $\epsilon 4$ , *APOE*  $\epsilon 2$ , age at death, sex, years of education, genotyping platform, and the first three genotype principal components. For the cell-type-specific ADPRS that showed a significant association with the trait (FDR<0.025), variance explained by the PRS was captured by comparing Nagelkerke's  $R^2$  between the models with and without the given PRS term ( $\Delta R^2$ ). For comparison, statistics for *APOE*  $\epsilon 4$  and  $\epsilon 2$  from the same model as All-ADPRS (with the same covariates) were shown in the bottom two lines of the table. All p-values are two-sided. To account for multiple comparisons, false discovery rate (FDR) correction was applied across all main tests in ROSMAP (**Supplementary Tables 3-9**), and statistically significant results (FDR<0.025) were indicated in bold. (Also see **Fig. 2**).

| Model                    | Beta         | 95% CI                       | t-value     | p-value                                | FDR                                    | $\Delta R^2$                           |
|--------------------------|--------------|------------------------------|-------------|----------------------------------------|----------------------------------------|----------------------------------------|
| <b>All</b>               | <b>0.081</b> | <b>0.027 to 0.14</b>         | <b>2.92</b> | <b><math>3.6 \times 10^{-3}</math></b> | <b><math>9.3 \times 10^{-3}</math></b> | <b><math>4.7 \times 10^{-3}</math></b> |
| Ex                       | 0.020        | -0.034 to 0.075              | 0.73        | 0.46                                   | 0.53                                   | NA                                     |
| In                       | -0.028       | -0.082 to 0.027              | -0.98       | 0.33                                   | 0.41                                   | NA                                     |
| <b>Ast</b>               | <b>0.093</b> | <b>0.039 to 0.15</b>         | <b>3.37</b> | <b><math>7.8 \times 10^{-4}</math></b> | <b><math>2.6 \times 10^{-3}</math></b> | <b><math>6.5 \times 10^{-3}</math></b> |
| Mic                      | 0.057        | $2.4 \times 10^{-3}$ to 0.11 | 2.05        | 0.041                                  | 0.074                                  | NA                                     |
| Oli                      | 0.055        | $1.1 \times 10^{-3}$ to 0.11 | 2.00        | 0.045                                  | 0.079                                  | NA                                     |
| Opc                      | 0.014        | -0.041 to 0.068              | 0.49        | 0.62                                   | 0.66                                   | NA                                     |
| <i>APOE</i> $\epsilon 4$ | 0.65         | 0.53 to 0.76                 | 11.1        | $2.1 \times 10^{-27}$                  | NA                                     | 0.077                                  |
| <i>APOE</i> $\epsilon 2$ | -0.35        | -0.50 to -0.21               | -4.73       | $2.5 \times 10^{-6}$                   | NA                                     | 0.014                                  |

**Supplementary Table 4. Association between cell-type-specific ADPRS and A $\beta$  in ROSMAP (n=1,381).** Beta (effect size) corresponds to units changed in A $\beta$  per 1 s.d. increase in ADPRS. ADPRS models (linear regression) were adjusted for *APOE*  $\epsilon 4$ , *APOE*  $\epsilon 2$ , age at death, sex, genotyping platform, and the first three genotype principal components. For the cell-type-specific ADPRS that showed a significant association with the trait (FDR<0.025), variance explained by the PRS was captured by comparing adjusted R<sup>2</sup> between the linear models with and without the given PRS term ( $\Delta R^2$ ). For comparison, the statistics for *APOE*  $\epsilon 4$  and  $\epsilon 2$  from the same model as All-ADPRS (with the same covariates) were shown in the bottom two lines of the table. All p-values are two-sided. To account for multiple comparisons, false discovery rate (FDR) correction was applied across all main tests in ROSMAP (**Supplementary Tables 3-9**), and statistically significant results (FDR<0.025) were indicated in bold. (Also see **Fig. 2**).

| Model                    | Beta                  | 95% CI                                          | t-value     | p-value                                | FDR          | $\Delta R^2$                           |
|--------------------------|-----------------------|-------------------------------------------------|-------------|----------------------------------------|--------------|----------------------------------------|
| All                      | 0.013                 | -0.011 to 0.037                                 | 1.04        | 0.30                                   | 0.39         | NA                                     |
| Ex                       | $-6.8 \times 10^{-3}$ | -0.031 to 0.018                                 | -0.55       | 0.58                                   | 0.64         | NA                                     |
| In                       | -0.011                | -0.036 to 0.013                                 | -0.92       | 0.36                                   | 0.43         | NA                                     |
| <b>Ast</b>               | <b>0.034</b>          | <b><math>9.8 \times 10^{-3}</math> to 0.058</b> | <b>2.75</b> | <b><math>6.0 \times 10^{-3}</math></b> | <b>0.014</b> | <b><math>4.1 \times 10^{-3}</math></b> |
| Mic                      | 0.016                 | $-8.2 \times 10^{-3}$ to 0.040                  | 1.30        | 0.19                                   | 0.26         | NA                                     |
| Oli                      | 0.026                 | $1.9 \times 10^{-3}$ to 0.050                   | 2.12        | 0.034                                  | 0.070        | NA                                     |
| Opc                      | 0.012                 | $-1.3 \times 10^{-3}$ to 0.036                  | 0.93        | 0.35                                   | 0.43         | NA                                     |
| <i>APOE</i> $\epsilon 4$ | 0.26                  | 0.21 to 0.31                                    | 9.93        | $1.6 \times 10^{-22}$                  | NA           | 0.061                                  |
| <i>APOE</i> $\epsilon 2$ | -0.14                 | -0.21 to -0.076                                 | -4.28       | $2.0 \times 10^{-5}$                   | NA           | 0.011                                  |

**Supplementary Table 5. Association between cell-type-specific ADPRS and diffuse plaque burden in ROSMAP (n=1,452).** Beta (effect size) corresponds to units changed in diffuse plaque burden per 1 s.d. increase in ADPRS. ADPRS models (linear regression) were adjusted for *APOE*  $\epsilon 4$ , *APOE*  $\epsilon 2$ , age at death, sex, genotyping platform, and the first three genotype principal components. For the cell-type-specific ADPRS that showed a significant association with the trait (FDR<0.025), variance explained by the PRS was captured by comparing adjusted  $R^2$  between the linear models with and without the given PRS term ( $\Delta R^2$ ). For comparison, the statistics for *APOE*  $\epsilon 4$  and  $\epsilon 2$  from the same model as All-ADPRS (with the same covariates) were shown in the bottom two lines of the table. All p-values are two-sided. To account for multiple comparisons, false discovery rate (FDR) correction was applied across all main tests in ROSMAP (**Supplementary Tables 3-9**), and statistically significant results (FDR<0.025) were indicated in bold. (Also see **Fig. 2**).

| Model                    | Beta                 | 95% CI                         | t-value              | p-value                                | FDR                                    | $\Delta R^2$                           |
|--------------------------|----------------------|--------------------------------|----------------------|----------------------------------------|----------------------------------------|----------------------------------------|
| <b>All</b>               | <b>0.059</b>         | <b>0.036 to 0.085</b>          | <b>4.53</b>          | <b><math>6.3 \times 10^{-6}</math></b> | <b><math>3.4 \times 10^{-5}</math></b> | <b>0.012</b>                           |
| Ex                       | 0.020                | $-6.1 \times 10^{-3}$ to 0.045 | 1.50                 | 0.13                                   | 0.19                                   | NA                                     |
| In                       | $1.2 \times 10^{-4}$ | -0.026 to 0.026                | $8.8 \times 10^{-3}$ | 0.99                                   | 0.99                                   | NA                                     |
| <b>Ast</b>               | <b>0.051</b>         | <b>0.026 to 0.077</b>          | <b>3.94</b>          | <b><math>8.4 \times 10^{-5}</math></b> | <b><math>3.2 \times 10^{-4}</math></b> | <b><math>8.6 \times 10^{-3}</math></b> |
| <b>Mic</b>               | <b>0.055</b>         | <b>0.029 to 0.080</b>          | <b>4.20</b>          | <b><math>2.8 \times 10^{-5}</math></b> | <b><math>1.3 \times 10^{-4}</math></b> | <b><math>9.9 \times 10^{-3}</math></b> |
| <b>Oli</b>               | <b>0.056</b>         | <b>0.031 to 0.082</b>          | <b>4.33</b>          | <b><math>1.6 \times 10^{-5}</math></b> | <b><math>7.7 \times 10^{-5}</math></b> | <b>0.011</b>                           |
| Opc                      | 0.012                | -0.014 to 0.038                | 0.90                 | 0.37                                   | 0.43                                   | NA                                     |
| <i>APOE</i> $\epsilon 4$ | 0.32                 | 0.27 to 0.38                   | 11.8                 | $1.2 \times 10^{-30}$                  | NA                                     | 0.081                                  |
| <i>APOE</i> $\epsilon 2$ | -0.19                | -0.25 to -0.12                 | -5.39                | $8.4 \times 10^{-8}$                   | NA                                     | 0.017                                  |

**Supplementary Table 6. Association between cell-type-specific ADPRS and neuritic plaque burden in ROSMAP (n=1,452).** Beta (effect size) corresponds to units changed in neuritic plaque burden per 1 s.d. increase in ADPRS. ADPRS models (linear regression) were adjusted for *APOE*  $\epsilon 4$ , *APOE*  $\epsilon 2$ , age at death, sex, genotyping platform, and the first three genotype principal components. For the cell-type-specific ADPRS that showed a significant association with the trait (FDR<0.025), variance explained by the PRS was captured by comparing adjusted  $R^2$  between the linear models with and without the given PRS term ( $\Delta R^2$ ). For comparison, the statistics for *APOE*  $\epsilon 4$  and  $\epsilon 2$  from the same model as All-ADPRS (with the same covariates) were shown in the bottom two lines of the table. All p-values are two-sided. To account for multiple comparisons, false discovery rate (FDR) correction was applied across all main tests in ROSMAP (Supplementary Tables 3-9), and statistically significant results (FDR<0.025) were indicated in bold. (Also see Fig. 2).

| Model                    | Beta        | 95% CI                        | t-value     | p-value                                 | FDR                                    | $\Delta R^2$                           |
|--------------------------|-------------|-------------------------------|-------------|-----------------------------------------|----------------------------------------|----------------------------------------|
| <b>All</b>               | <b>0.24</b> | <b>0.17 to 0.31</b>           | <b>6.72</b> | <b><math>2.6 \times 10^{-11}</math></b> | <b><math>1.3 \times 10^{-9}</math></b> | <b>0.026</b>                           |
| <b>Ex</b>                | <b>0.10</b> | <b>0.032 to 0.17</b>          | <b>2.84</b> | <b><math>4.5 \times 10^{-3}</math></b>  | <b>0.011</b>                           | <b><math>4.3 \times 10^{-3}</math></b> |
| In                       | 0.063       | $-7.3 \times 10^{-3}$ to 0.13 | 1.76        | 0.079                                   | 0.13                                   | NA                                     |
| <b>Ast</b>               | <b>0.12</b> | <b>0.047 to 0.19</b>          | <b>3.29</b> | <b><math>1.0 \times 10^{-3}</math></b>  | <b><math>3.0 \times 10^{-3}</math></b> | <b><math>5.9 \times 10^{-3}</math></b> |
| <b>Mic</b>               | <b>0.21</b> | <b>0.15 to 0.28</b>           | <b>6.09</b> | <b><math>1.4 \times 10^{-9}</math></b>  | <b><math>2.3 \times 10^{-8}</math></b> | <b>0.021</b>                           |
| <b>Oli</b>               | <b>0.18</b> | <b>0.11 to 0.25</b>           | <b>5.17</b> | <b><math>2.7 \times 10^{-7}</math></b>  | <b><math>2.2 \times 10^{-6}</math></b> | <b>0.015</b>                           |
| Opc                      | 0.087       | 0.017 to 0.16                 | 2.45        | 0.014                                   | 0.031                                  | NA                                     |
| <i>APOE</i> $\epsilon 4$ | 0.77        | 0.62 to 0.91                  | 10.3        | $3.9 \times 10^{-24}$                   | NA                                     | 0.062                                  |
| <i>APOE</i> $\epsilon 2$ | -0.31       | -0.50 to -0.13                | -3.35       | $8.3 \times 10^{-4}$                    | NA                                     | $6.0 \times 10^{-3}$                   |

**Supplementary Table 7. Association between cell-type-specific ADPRS and tau in ROSMAP (n=1,451).** Beta (effect size) corresponds to units changed in tau per 1 s.d. increase in ADPRS. ADPRS models (linear regression) were adjusted for *APOE*  $\epsilon 4$ , *APOE*  $\epsilon 2$ , age at death, sex, genotyping platform, and the first three genotype principal components. For the cell-type-specific ADPRS that showed a significant association with the trait (FDR<0.025), variance explained by the PRS was captured by comparing adjusted  $R^2$  between the linear models with and without the given PRS term ( $\Delta R^2$ ). For comparison, the statistics for *APOE*  $\epsilon 4$  and  $\epsilon 2$  from the same model as All-ADPRS (with the same covariates) were shown in the bottom two lines of the table. All p-values are two-sided. To account for multiple comparisons, false discovery rate (FDR) correction was applied across all main tests in ROSMAP (Supplementary Tables 3-9), and statistically significant results (FDR<0.025) were indicated in bold. (Also see Fig. 2).



| Model                    | Beta         | 95% CI                         | t-value     | p-value                                 | FDR                                    | $\Delta R^2$                           |
|--------------------------|--------------|--------------------------------|-------------|-----------------------------------------|----------------------------------------|----------------------------------------|
| <b>All</b>               | <b>0.068</b> | <b>0.048 to 0.089</b>          | <b>6.52</b> | <b><math>9.4 \times 10^{-11}</math></b> | <b><math>2.3 \times 10^{-9}</math></b> | <b>0.024</b>                           |
| Ex                       | 0.017        | $-3.6 \times 10^{-3}$ to 0.038 | 1.62        | 0.10                                    | 0.16                                   | NA                                     |
| In                       | 0.015        | $-5.7 \times 10^{-3}$ to 0.036 | 1.42        | 0.16                                    | 0.22                                   | NA                                     |
| <b>Ast</b>               | <b>0.035</b> | <b>0.014 to 0.056</b>          | <b>3.33</b> | <b><math>8.8 \times 10^{-4}</math></b>  | <b><math>2.7 \times 10^{-3}</math></b> | <b><math>6.1 \times 10^{-3}</math></b> |
| <b>Mic</b>               | <b>0.055</b> | <b>0.035 to 0.076</b>          | <b>5.30</b> | <b><math>1.4 \times 10^{-7}</math></b>  | <b><math>1.3 \times 10^{-6}</math></b> | <b>0.016</b>                           |
| <b>Oli</b>               | <b>0.049</b> | <b>0.029 to 0.070</b>          | <b>4.70</b> | <b><math>2.8 \times 10^{-6}</math></b>  | <b><math>2.0 \times 10^{-5}</math></b> | <b>0.013</b>                           |
| Opc                      | 0.022        | $1.1 \times 10^{-3}$ to 0.043  | 2.06        | 0.039                                   | 0.074                                  | NA                                     |
| <i>APOE</i> $\epsilon 4$ | 0.23         | 0.19 to 0.28                   | 10.5        | $5.2 \times 10^{-25}$                   | NA                                     | 0.064                                  |
| <i>APOE</i> $\epsilon 2$ | -0.12        | -0.17 to -0.066                | -4.34       | $1.5 \times 10^{-5}$                    | NA                                     | 0.010                                  |

**Supplementary Table 8. Association between cell-type-specific ADPRS and neurofibrillary tangle (NFT) burden in ROSMAP (n=1,452).** Beta (effect size) corresponds to units changed in neuritic plaque burden per 1 s.d. increase in ADPRS. ADPRS models (linear regression) were adjusted for *APOE*  $\epsilon 4$ , *APOE*  $\epsilon 2$ , age at death, sex, genotyping platform, and the first three genotype principal components. For the cell-type-specific ADPRS that showed a significant association with the trait (FDR<0.025), variance explained by the PRS was captured by comparing adjusted  $R^2$  between the linear models with and without the given PRS term ( $\Delta R^2$ ). For comparison, the statistics for *APOE*  $\epsilon 4$  and  $\epsilon 2$  from the same model as All-ADPRS (with the same covariates) were shown in the bottom two lines of the table. All p-values are two-sided. To account for multiple comparisons, false discovery rate (FDR) correction was applied across all main tests in ROSMAP (**Supplementary Tables 3-9**), and statistically significant results (FDR<0.025) were indicated in bold. (Also see **Fig. 2**).

| Model                    | Beta                        | 95% CI                                         | t-value      | p-value                    | FDR                        | $\Delta R^2$               |
|--------------------------|-----------------------------|------------------------------------------------|--------------|----------------------------|----------------------------|----------------------------|
| <b>All</b>               | <b>-0.013</b>               | <b>-0.018 to -8.6×10<sup>-3</sup></b>          | <b>-5.50</b> | <b>4.5×10<sup>-8</sup></b> | <b>5.5×10<sup>-7</sup></b> | <b>0.019</b>               |
| Ex                       | -4.2×10 <sup>-3</sup>       | -9.0×10 <sup>-3</sup> to 5.6×10 <sup>-4</sup>  | -1.73        | 0.084                      | 0.13                       | NA                         |
| In                       | 1.5×10 <sup>-4</sup>        | -4.7×10 <sup>-3</sup> to 5.0×10 <sup>-3</sup>  | 0.061        | 0.95                       | 0.97                       | NA                         |
| Ast                      | -5.1×10 <sup>-3</sup>       | -9.9×10 <sup>-3</sup> to -2.7×10 <sup>-4</sup> | -2.07        | 0.038                      | 0.074                      | NA                         |
| <b>Mic</b>               | <b>-9.8×10<sup>-3</sup></b> | <b>-0.015 to -5.1×10<sup>-3</sup></b>          | <b>-4.05</b> | <b>5.5×10<sup>-5</sup></b> | <b>2.3×10<sup>-4</sup></b> | <b>0.010</b>               |
| <b>Oli</b>               | <b>-7.2×10<sup>-3</sup></b> | <b>-0.012 to -2.5×10<sup>-3</sup></b>          | <b>-2.95</b> | <b>3.2×10<sup>-3</sup></b> | <b>8.7×10<sup>-3</sup></b> | <b>5.2×10<sup>-3</sup></b> |
| Opc                      | -4.1×10 <sup>-3</sup>       | -8.9×10 <sup>-3</sup> to 7.3×10 <sup>-4</sup>  | -1.67        | 0.096                      | 0.15                       | NA                         |
| <i>APOE</i> $\epsilon$ 4 | -0.053                      | -0.063 to -0.0043                              | -10.3        | 3.9×10 <sup>-24</sup>      | NA                         | 0.070                      |
| <i>APOE</i> $\epsilon$ 2 | 0.017                       | 4.3×10 <sup>-3</sup> to 0.030                  | 2.63         | 8.7×10 <sup>-3</sup>       | NA                         | 3.9×10 <sup>-3</sup>       |

**Supplementary Table 9. Association between cell-type-specific ADPRS and cognitive decline (CogDec) in ROSMAP (n=1,374).** Beta (effect size) corresponds to units changed in CogDec per 1 s.d. increase in ADPRS. ADPRS models (linear regression) were adjusted for *APOE*  $\epsilon$ 4, *APOE*  $\epsilon$ 2, genotyping platform, and the first three genotype principal components. For the cell-type-specific ADPRS that showed a significant association with the trait (FDR<0.025), variance explained by the PRS was captured by comparing adjusted R<sup>2</sup> between the linear models with and without the given PRS term ( $\Delta R^2$ ). For comparison, the statistics for *APOE*  $\epsilon$ 4 and  $\epsilon$ 2 from the same model as All-ADPRS (with the same covariates) were shown in the bottom two lines of the table. All p-values are two-sided. To account for multiple comparisons, false discovery rate (FDR) correction was applied across all main tests in ROSMAP (Supplementary Tables 3-9), and statistically significant results (FDR<0.025) were indicated in bold. (Also see Fig. 2).

| Model                  | Beta  | 95% CI                       | t-value | p-value              |
|------------------------|-------|------------------------------|---------|----------------------|
| Ex (adjusted for Mic)  | 0.086 | 0.017 to 0.16                | 2.43    | 0.015                |
| Ast (adjusted for Mic) | 0.096 | 0.027 to 0.17                | 2.72    | $6.7 \times 10^{-3}$ |
| Oli (adjusted for Mic) | 0.091 | $7.4 \times 10^{-3}$ to 0.17 | 2.14    | 0.033                |

**Supplementary Table 10. Association between cell-type-specific ADPRS and tau in ROSMAP (n=1,451), adjusting for Mic-ADPRS.** Beta (effect size) corresponds to units changed in tau per 1 s.d. increase in ADPRS. ADPRS models (linear regression) were adjusted for Mic-ADPRS, *APOE*  $\epsilon 4$ , *APOE*  $\epsilon 2$ , age at death, sex, genotyping platform, and the first three genotype principal components. All p-values are two-sided and not adjusted for multiple comparisons.

| Model               | Beta  | 95% CI        | t-value | p-value              |
|---------------------|-------|---------------|---------|----------------------|
| Ex (excluding Mic)  | 0.10  | 0.034 to 0.17 | 2.92    | $3.6 \times 10^{-3}$ |
| Ast (excluding Mic) | 0.092 | 0.022 to 0.16 | 2.58    | $9.9 \times 10^{-3}$ |
| Oli (excluding Mic) | 0.16  | 0.086 to 0.22 | 4.37    | $1.3 \times 10^{-5}$ |

**Supplementary Table 11. Association between cell-type-specific ADPRS and tau in ROSMAP (n=1,451), excluding genes overlapping with Mic-ADPRS.** Beta (effect size) corresponds to units changed in tau per 1 s.d. increase in ADPRS. Ex-, Ast-, and Oli- ADPRS were calculated after excluding genes overlapping with Mic-ADPRS. ADPRS models (linear regression) were adjusted for *APOE*  $\epsilon 4$ , *APOE*  $\epsilon 2$ , age at death, sex, genotyping platform, and the first three genotype principal components. All p-values are two-sided and not adjusted for multiple comparisons.

|                                         | ROSMAP (n=201) |
|-----------------------------------------|----------------|
| Mean Age at Death, years (SD)           | 89.7 (5.5)     |
| Female (%)                              | 126 (63)       |
| Mean Education, years (SD)              | 14.6 (2.6)     |
| <i>APOE</i> $\epsilon$ 4 carrier (%)    | 40 (20)        |
| Elevated A $\beta$ (%)                  | 127 (63)       |
| Pathological diagnosis of AD            | 122 (61)       |
| Median MMSE (IQR)                       | 25 (8.8)       |
| All-cause dementia (%)                  | 76 (38)        |
| AD dementia (%)                         | 62 (31)        |
| Proportion of Activated Microglia (PAM) | 0.084 (0.057)  |

**Supplementary Table 12. Study Participant Characteristics (MAP study microglial morphology subset).**

| Phenotype | Cell Type (Genomic Margin) | Beta or OR            | 95% CI                          | t-value | p-value               |
|-----------|----------------------------|-----------------------|---------------------------------|---------|-----------------------|
| AD dem    | Mic (10 kb)                | 1.53                  | 1.27 to 1.85                    | 4.37    | $1.2 \times 10^{-5}$  |
| AD dem    | Mic (100 kb)               | 1.57                  | 1.30 to 1.91                    | 4.67    | $3.0 \times 10^{-6}$  |
| A $\beta$ | Ast (10 kb)                | 0.080                 | 0.026 to 0.13                   | 2.92    | $3.5 \times 10^{-3}$  |
| A $\beta$ | Ast (100 kb)               | 0.093                 | 0.039 to 0.15                   | 3.37    | $7.8 \times 10^{-4}$  |
| DP        | Ast (10 kb)                | 0.032                 | $7.6 \times 10^{-3}$ to 0.056   | 2.58    | 0.010                 |
| DP        | Ast (100 kb)               | 0.040                 | 0.016 to 0.064                  | 3.25    | $1.2 \times 10^{-3}$  |
| NP        | Ast (10 kb)                | 0.042                 | 0.017 to 0.068                  | 3.25    | $1.2 \times 10^{-3}$  |
| NP        | Ast (100 kb)               | 0.056                 | 0.031 to 0.082                  | 4.33    | $1.6 \times 10^{-5}$  |
| NP        | Mic (10 kb)                | 0.051                 | 0.025 to 0.076                  | 3.91    | $9.8 \times 10^{-5}$  |
| NP        | Mic (100 kb)               | 0.072                 | 0.046 to 0.097                  | 5.56    | $3.2 \times 10^{-8}$  |
| NP        | Oli (10 kb)                | 0.060                 | 0.035 to 0.086                  | 4.64    | $3.7 \times 10^{-6}$  |
| NP        | Oli (100 kb)               | 0.059                 | 0.034 to 0.085                  | 4.58    | $5.1 \times 10^{-6}$  |
| Tau       | Ex (10 kb)                 | 0.066                 | $-3.8 \times 10^{-3}$ to 0.14   | 1.85    | 0.064                 |
| Tau       | Ex (100 kb)                | 0.15                  | 0.082 to 0.22                   | 4.28    | $2.0 \times 10^{-5}$  |
| Tau       | Ast (10 kb)                | 0.11                  | 0.043 to 0.18                   | 3.16    | $1.6 \times 10^{-3}$  |
| Tau       | Ast (100 kb)               | 0.12                  | 0.047 to 0.19                   | 3.29    | $1.0 \times 10^{-3}$  |
| Tau       | Mic (10 kb)                | 0.21                  | 0.14 to 0.27                    | 5.85    | $6.0 \times 10^{-9}$  |
| Tau       | Mic (100 kb)               | 0.24                  | 0.17 to 0.31                    | 6.92    | $6.8 \times 10^{-12}$ |
| Tau       | Oli (10 kb)                | 0.18                  | 0.11 to 0.25                    | 5.01    | $6.0 \times 10^{-7}$  |
| Tau       | Oli (100 kb)               | 0.19                  | 0.12 to 0.26                    | 5.48    | $5.2 \times 10^{-8}$  |
| NFT       | Ast (10 kb)                | 0.032                 | 0.011 to 0.052                  | 3.02    | $2.5 \times 10^{-3}$  |
| NFT       | Ast (100 kb)               | 0.034                 | 0.014 to 0.055                  | 3.28    | $1.1 \times 10^{-3}$  |
| NFT       | Mic (10 kb)                | 0.050                 | 0.029 to 0.070                  | 4.78    | $2.0 \times 10^{-6}$  |
| NFT       | Mic (100 kb)               | 0.066                 | 0.046 to 0.087                  | 6.39    | $2.1 \times 10^{-10}$ |
| NFT       | Oli (10 kb)                | 0.048                 | 0.027 to 0.068                  | 4.54    | $6.1 \times 10^{-6}$  |
| NFT       | Oli (100 kb)               | 0.051                 | 0.031 to 0.072                  | 4.97    | $7.5 \times 10^{-7}$  |
| CogDec    | Mic (10 kb)                | -0.011                | -0.016 to $-6.7 \times 10^{-3}$ | -4.72   | $2.6 \times 10^{-6}$  |
| CogDec    | Mic (100 kb)               | -0.013                | -0.017 to $-7.8 \times 10^{-3}$ | -5.19   | $2.4 \times 10^{-7}$  |
| CogDec    | Oli (10 kb)                | $-7.6 \times 10^{-3}$ | -0.012 to $-2.8 \times 10^{-3}$ | -3.11   | $1.9 \times 10^{-3}$  |
| CogDec    | Oli (100 kb)               | $-8.4 \times 10^{-3}$ | -0.013 to $-3.6 \times 10^{-3}$ | -3.45   | $5.8 \times 10^{-4}$  |

**Supplementary Table 13. Association between cell-type-specific ADPRS using different genomic margins and AD endophenotypes in ROSMAP.** For the significant findings from the ROSMAP main analyses (FDR<0.025 in Fig. 2), we performed sensitivity analyses using cell-type-specific ADPRS with different genomic margins (genes  $\pm$  10kb or  $\pm$  100kb). All models (logistic regression for AD dem outcome, linear regression for others) were adjusted for *APOE*  $\epsilon$ 4, *APOE*  $\epsilon$ 2, age, sex, genotyping platform, years of education (only for AD dem and CogDec), and the first three genotype principal components. All p-values are two-sided and not adjusted for multiple comparisons. Abbreviations: AD dem, AD with dementia; CogDec, cognitive decline; OR, odds ratio.

| Phenotype | Cell Type | Beta or OR            | 95% CI                            | t-value | p-value              |
|-----------|-----------|-----------------------|-----------------------------------|---------|----------------------|
| AD dem    | Mic       | 1.46                  | 1.21 to 1.77                      | 3.92    | $8.9 \times 10^{-5}$ |
| A $\beta$ | Ast       | 0.095                 | 0.040 to 0.15                     | 3.42    | $6.4 \times 10^{-4}$ |
| DP        | Ast       | 0.035                 | 0.011 to 0.059                    | 2.83    | $4.7 \times 10^{-3}$ |
| NP        | Ast       | 0.053                 | 0.027 to 0.078                    | 4.03    | $5.8 \times 10^{-5}$ |
| NP        | Mic       | 0.055                 | 0.029 to 0.080                    | 4.22    | $2.6 \times 10^{-5}$ |
| NP        | Oli       | 0.057                 | 0.032 to 0.083                    | 4.39    | $1.2 \times 10^{-5}$ |
| Tau       | Ex        | 0.098                 | 0.028 to 0.17                     | 2.74    | $6.2 \times 10^{-3}$ |
| Tau       | Ast       | 0.12                  | 0.048 to 0.19                     | 3.32    | $9.4 \times 10^{-4}$ |
| Tau       | Mic       | 0.21                  | 0.14 to 0.28                      | 6.06    | $1.8 \times 10^{-9}$ |
| Tau       | Oli       | 0.18                  | 0.11 to 0.25                      | 5.17    | $2.6 \times 10^{-7}$ |
| NFT       | Ast       | 0.035                 | 0.015 to 0.056                    | 3.35    | $8.3 \times 10^{-4}$ |
| NFT       | Mic       | 0.055                 | 0.034 to 0.075                    | 5.25    | $1.7 \times 10^{-7}$ |
| NFT       | Oli       | 0.049                 | 0.029 to 0.070                    | 4.69    | $3.0 \times 10^{-6}$ |
| CogDec    | Mic       | $-9.8 \times 10^{-3}$ | $-0.015$ to $-5.1 \times 10^{-3}$ | -4.05   | $5.5 \times 10^{-5}$ |
| CogDec    | Oli       | $-7.0 \times 10^{-3}$ | $-0.012$ to $-2.2 \times 10^{-3}$ | -2.85   | $4.5 \times 10^{-3}$ |

**Supplementary Table 14. Association between cell-type-specific ADPRS and AD endophenotypes in ROSMAP, using 10 genotype PCs.** For the significant findings from the ROSMAP main analyses (FDR<0.025 in Fig. 2), we performed sensitivity analyses adjusting for 10 genotype PCs (instead of 3 PCs adjusted in the main analyses). All models (logistic regression for AD dem outcome, linear regression for others) were adjusted for *APOE*  $\epsilon$ 4, *APOE*  $\epsilon$ 2, age, sex, genotyping platform, years of education (only for AD dem and CogDec), and the first three genotype principal components. All p-values are two-sided and not adjusted for multiple comparisons. Abbreviations: AD dem, AD with dementia; CogDec, cognitive decline; OR, odds ratio; PCs, principal components.

| Phenotype | Cell Type | OR/Beta               | 95% CI                                        | t-value | p-value              | $\Delta R^2$<br>(PRSet) | $\Delta R^2$<br>(PRSCS) |
|-----------|-----------|-----------------------|-----------------------------------------------|---------|----------------------|-------------------------|-------------------------|
| AD dem    | Mic       | 1.16                  | 0.97 to 1.39                                  | 1.57    | 0.12                 | NA                      | 0.020                   |
| A $\beta$ | Ast       | 0.032                 | -0.023 to 0.086                               | 1.14    | 0.25                 | NA                      | $6.5 \times 10^{-3}$    |
| DP        | Ast       | $5.8 \times 10^{-3}$  | -0.019 to 0.030                               | 0.47    | 0.64                 | NA                      | $4.1 \times 10^{-3}$    |
| NP        | Ast       | 0.012                 | -0.014 to 0.038                               | 0.91    | 0.37                 | NA                      | $8.6 \times 10^{-3}$    |
| NP        | Mic       | 0.039                 | 0.013 to 0.064                                | 2.95    | $3.3 \times 10^{-3}$ | $4.6 \times 10^{-3}$    | $9.9 \times 10^{-3}$    |
| NP        | Oli       | 0.041                 | 0.015 to 0.066                                | 3.12    | $1.8 \times 10^{-3}$ | $5.2 \times 10^{-3}$    | 0.011                   |
| Tau       | Ex        | 0.14                  | 0.068 to 0.21                                 | 3.87    | $1.2 \times 10^{-4}$ | $8.4 \times 10^{-3}$    | $4.3 \times 10^{-3}$    |
| Tau       | Ast       | 0.019                 | -0.051 to 0.088                               | 0.52    | 0.60                 | NA                      | $5.9 \times 10^{-3}$    |
| Tau       | Mic       | 0.15                  | 0.084 to 0.22                                 | 4.32    | $1.6 \times 10^{-5}$ | 0.011                   | 0.021                   |
| Tau       | Oli       | 0.12                  | 0.049 to 0.19                                 | 3.34    | $8.6 \times 10^{-4}$ | $6.1 \times 10^{-3}$    | 0.015                   |
| NFT       | Ast       | $7.8 \times 10^{-3}$  | -0.013 to 0.028                               | 0.74    | 0.46                 | NA                      | $6.1 \times 10^{-3}$    |
| NFT       | Mic       | 0.036                 | 0.015 to 0.056                                | 3.40    | $6.9 \times 10^{-4}$ | $6.4 \times 10^{-3}$    | 0.016                   |
| NFT       | Oli       | 0.029                 | $8.7 \times 10^{-3}$ to 0.050                 | 2.79    | $5.3 \times 10^{-3}$ | $4.1 \times 10^{-3}$    | 0.013                   |
| CogDec    | Mic       | $-6.6 \times 10^{-3}$ | -0.011 to $-1.8 \times 10^{-3}$               | -2.72   | $6.7 \times 10^{-3}$ | $4.3 \times 10^{-3}$    | 0.010                   |
| CogDec    | Oli       | $-4.6 \times 10^{-3}$ | $-9.4 \times 10^{-3}$ to $1.9 \times 10^{-4}$ | -1.88   | 0.060                | NA                      | $5.2 \times 10^{-3}$    |

**Supplementary Table 15. Association between PRSet-derived ADPRS and AD endophenotypes in ROSMAP.** For the significant findings from the ROSMAP main analyses (FDR<0.025 in Fig. 2), we benchmarked our approach against PRSet. For the PRSet-derived ADPRS that showed a nominal association with the trait (uncorrected  $p < 0.05$ ), variance explained by the PRS was calculated by comparing adjusted  $R^2$  between the linear models with and without the given PRS term ( $\Delta R^2$ ).  $\Delta R^2$  from the main results (using PRS-CS) were shown for comparison. All models (logistic regression for AD dem outcome, linear regression for others) were adjusted for *APOE*  $\epsilon 4$ , *APOE*  $\epsilon 2$ , age, sex, genotyping platform, years of education (only for AD dem and CogDec), and the first three genotype principal components. All p-values are two-sided and not adjusted for multiple comparisons.



| Model              | Effect type         | Effect (95% bootstrap CI)                          | p-value              |
|--------------------|---------------------|----------------------------------------------------|----------------------|
| Ast → DP → NP      | ACME                | 0.023 (6.9×10 <sup>-3</sup> to 0.04)               | 5.4×10 <sup>-3</sup> |
|                    | ADE                 | 0.028 (8.8×10 <sup>-3</sup> to 0.05)               | 4.0×10 <sup>-3</sup> |
|                    | Total effect        | 0.051 (0.026 to 0.08)                              | 2.0×10 <sup>-4</sup> |
|                    | Mediated proportion | 0.46 (0.18 to 0.74)                                | 5.6×10 <sup>-3</sup> |
| Ast → NP → NFT     | ACME                | 0.023 (0.012 to 0.03)                              | 0                    |
|                    | ADE                 | 0.012 (-4.3×10 <sup>-3</sup> to 0.03)              | 0.15                 |
|                    | Total effect        | 0.035 (0.015 to 0.05)                              | 2.0×10 <sup>-4</sup> |
|                    | Mediated proportion | 0.65 (0.38 to 1.24)                                | 2.0×10 <sup>-4</sup> |
| Mic → NP → NFT     | ACME                | 0.024 (0.013 to 0.03)                              | 0                    |
|                    | ADE                 | 0.031 (0.014 to 0.05)                              | 0                    |
|                    | Total effect        | 0.054 (0.034 to 0.07)                              | 0                    |
|                    | Mediated proportion | 0.44 (0.27 to 0.66)                                | 0                    |
| Mic → NFT → CogDec | ACME                | -1.8×10 <sup>-3</sup> (-3.0×10 <sup>-3</sup> to 0) | 5.8×10 <sup>-3</sup> |
|                    | ADE                 | -5.5×10 <sup>-3</sup> (-9.7×10 <sup>-3</sup> to 0) | 6.0×10 <sup>-3</sup> |
|                    | Total effect        | -7.3×10 <sup>-3</sup> (-0.012 to 0)                | 2.0×10 <sup>-4</sup> |
|                    | Mediated proportion | 0.24 (0.080 to 0.56)                               | 2.0×10 <sup>-4</sup> |

**Supplementary Table 16. Causal mediation analysis (ROSMAP).** Mediation models based on linear regression were run using non-parametric bootstrapping over 10,000 simulations, and 95% bootstrap confidence intervals and empiric two-sided p-values are shown. Also see **Fig. 3**. First three models were adjusted for *APOE*  $\epsilon 4$ ,  $\epsilon 2$ , age at death, sex, education, genotyping batch, and first three genotype principal components (PC1-3). The Mic → NFT → CogDec model was adjusted for neuritic plaque (NP) burden, *APOE*  $\epsilon 4$ ,  $\epsilon 2$ , genotyping batch, and PC1-3. The slope of cognitive decline (CogDec) was already adjusted for age, sex, and education. Abbreviations: ACME, average causal mediated effects. ADE, average direct effects. CogDec, cognitive decline. DP, diffuse plaque. NFT, neurofibrillary tangle. NP, neuritic plaque.

|                       | Mean (s.d.)                                                  | N_nonmissing |
|-----------------------|--------------------------------------------------------------|--------------|
| A $\beta$ (SUVR)      | 1.1 (0.19)                                                   | 2,921        |
| Tau (SUVR)            | 1.2 (0.11)                                                   | 302          |
| HV (mm <sup>3</sup> ) | 3.7 $\times$ 10 <sup>3</sup> (4.2 $\times$ 10 <sup>2</sup> ) | 1,266        |
| PACC (unit)           | 0.20 (2.5)                                                   | 2,918        |

**Supplementary Table 17. AD endophenotypes tested in A4.** The mean and standard deviation (s.d.) of the AD endophenotypes tested for their associations with cell-type-specific ADPRSs in A4 are shown. Abbreviations: N\_nonmissing, number of participants with non-missing data. Abbreviations: HV, hippocampal volume; PACC, Preclinical Alzheimer Cognitive Composite; SUVR, standardized uptake value ratio.

| Model                    | Beta                                   | 95% CI                                          | t-value     | p-value                                | FDR                                    | $\Delta R^2$                           |
|--------------------------|----------------------------------------|-------------------------------------------------|-------------|----------------------------------------|----------------------------------------|----------------------------------------|
| <b>All</b>               | <b>0.019</b>                           | <b>0.012 to 0.025</b>                           | <b>5.73</b> | <b><math>1.1 \times 10^{-8}</math></b> | <b><math>3.2 \times 10^{-7}</math></b> | <b><math>8.9 \times 10^{-3}</math></b> |
| <b>Ex</b>                | <b><math>8.6 \times 10^{-3}</math></b> | <b><math>2.2 \times 10^{-3}</math> to 0.015</b> | <b>2.62</b> | <b><math>8.9 \times 10^{-3}</math></b> | <b>0.025</b>                           | <b><math>1.6 \times 10^{-3}</math></b> |
| In                       | $-6.2 \times 10^{-4}$                  | $-7.0 \times 10^{-3}$ to $5.8 \times 10^{-3}$   | -0.19       | 0.85                                   | 0.90                                   | NA                                     |
| <b>Ast</b>               | <b><math>9.6 \times 10^{-3}</math></b> | <b><math>3.1 \times 10^{-3}</math> to 0.016</b> | <b>2.92</b> | <b><math>3.5 \times 10^{-3}</math></b> | <b>0.012</b>                           | <b><math>2.1 \times 10^{-3}</math></b> |
| <b>Mic</b>               | <b>0.017</b>                           | <b>0.011 to 0.024</b>                           | <b>5.35</b> | <b><math>9.3 \times 10^{-8}</math></b> | <b><math>1.3 \times 10^{-6}</math></b> | <b><math>7.7 \times 10^{-3}</math></b> |
| <b>Oli</b>               | <b><math>9.9 \times 10^{-3}</math></b> | <b><math>3.5 \times 10^{-3}</math> to 0.016</b> | <b>3.03</b> | <b><math>2.5 \times 10^{-3}</math></b> | <b>0.010</b>                           | <b><math>2.3 \times 10^{-3}</math></b> |
| Opc                      | $7.8 \times 10^{-3}$                   | $1.4 \times 10^{-3}$ to 0.014                   | 2.37        | 0.018                                  | 0.041                                  | NA                                     |
| <i>APOE</i> $\epsilon 4$ | 0.14                                   | 0.13 to 0.15                                    | 22.9        | $8.1 \times 10^{-107}$                 | NA                                     | 0.15                                   |
| <i>APOE</i> $\epsilon 2$ | -0.028                                 | -0.046 to $-9.7 \times 10^{-3}$                 | -2.99       | $2.8 \times 10^{-3}$                   | NA                                     | $2.2 \times 10^{-3}$                   |

**Supplementary Table 18. Association between cell-type-specific ADPRS and A $\beta$  in A4 (n=2,921).** Beta (effect size) corresponds to units changed in florbetapir PET SUVR (cortical composite) per 1 s.d. increase in ADPRS. ADPRS models (linear regression) were adjusted for *APOE*  $\epsilon 4$ , *APOE*  $\epsilon 2$ , age, sex, and the first three genotype principal components. For the cell-type-specific ADPRS that showed a significant association with the trait (FDR<0.025), variance explained by the PRS was captured by comparing adjusted R<sup>2</sup> between the linear models with and without the given PRS term ( $\Delta R^2$ ). For comparison, the statistics for *APOE*  $\epsilon 4$  and  $\epsilon 2$  from the same model as All-ADPRS (with the same covariates) were shown in the bottom two lines of the table. All p-values are two-sided. To account for multiple comparisons, false discovery rate (FDR) correction was applied across all main tests in A4, and statistically significant results (FDR<0.025) were indicated in bold. (Also see **Fig. 4**).

| Model                  | Beta                 | 95% CI                                        | t-value | p-value |
|------------------------|----------------------|-----------------------------------------------|---------|---------|
| Ex (adjusted for Mic)  | $6.8 \times 10^{-3}$ | $3.6 \times 10^{-4}$ to 0.013                 | 2.07    | 0.038   |
| Ast (adjusted for Mic) | $8.0 \times 10^{-3}$ | $1.6 \times 10^{-3}$ to 0.014                 | 2.43    | 0.015   |
| Oli (adjusted for Mic) | $1.3 \times 10^{-3}$ | $-6.1 \times 10^{-3}$ to $8.7 \times 10^{-3}$ | 0.35    | 0.73    |

**Supplementary Table 19. Association between cell-type-specific ADPRS and A $\beta$  in A4 (n=2,921), adjusting for Mic-ADPRS.** Beta (effect size) corresponds to units changed in florbetapir PET SUVR (cortical composite) per 1 s.d. increase in ADPRS. ADPRS models were adjusted for Mic-ADPRS, *APOE*  $\epsilon$ 4, *APOE*  $\epsilon$ 2, age, sex, and the first three genotype principal components. All p-values are two-sided and not adjusted for multiple comparisons.

| Model               | Beta                 | 95% CI                         | t-value | p-value              |
|---------------------|----------------------|--------------------------------|---------|----------------------|
| Ex (excluding Mic)  | $8.5 \times 10^{-3}$ | $2.0 \times 10^{-3}$ to 0.015  | 2.58    | $9.9 \times 10^{-3}$ |
| Ast (excluding Mic) | $7.9 \times 10^{-3}$ | $1.5 \times 10^{-3}$ to 0.014  | 2.42    | 0.016                |
| Oli (excluding Mic) | $6.3 \times 10^{-3}$ | $-1.1 \times 10^{-4}$ to 0.013 | 1.93    | 0.054                |

**Supplementary Table 20. Association between cell-type-specific ADPRS and A $\beta$  in A4 (n=2,921; excluding genes overlapping with Mic-ADPRS).** Beta (effect size) corresponds to units changed in A $\beta$  per 1 s.d. increase in ADPRS. Ex-, Ast-, and Oli- ADPRS were calculated after excluding genes overlapping with Mic-ADPRS. ADPRS models were adjusted for *APOE*  $\epsilon$ 4, *APOE*  $\epsilon$ 2, age at death, sex, and the first three genotype principal components. All p-values are two-sided and not adjusted for multiple comparisons.

|                                                | A4/LEARN Tau subset (n=302) |
|------------------------------------------------|-----------------------------|
| Mean Age, years (SD)                           | 71.7 (4.7)                  |
| Female (%)                                     | 183 (61)                    |
| Mean Education, years (SD)                     | 16.3 (2.7)                  |
| <i>APOE</i> $\epsilon$ 4 carrier (%)           | 164 (54)                    |
| Mean Florbetapir, cortical SUVR (SD)           | 1.29 (0.20)                 |
| Mean Flortaucipir, inferior temporal SUVR (SD) | 1.53 (0.28)                 |
| Elevated A $\beta$ (%)                         | 263 (87)                    |
| Median MMSE (IQR)                              | 29 (2)                      |
| AD dementia (%)                                | 0 (0)                       |

**Supplementary Table 21. Study Participant Characteristics (A4/LEARN Tau subset).**

| Model                    | Beta                  | 95% CI                                                       | t-value     | p-value                                | FDR                                    | $\Delta R^2$ |
|--------------------------|-----------------------|--------------------------------------------------------------|-------------|----------------------------------------|----------------------------------------|--------------|
| <b>All</b>               | <b>0.021</b>          | <b><math>8.4 \times 10^{-3}</math> to <math>0.033</math></b> | <b>3.28</b> | <b><math>1.2 \times 10^{-3}</math></b> | <b><math>6.9 \times 10^{-3}</math></b> | <b>0.030</b> |
| Ex                       | $-3.2 \times 10^{-3}$ | -0.016 to $9.4 \times 10^{-3}$                               | -0.50       | 0.62                                   | 0.72                                   | NA           |
| In                       | $1.1 \times 10^{-3}$  | -0.012 to 0.014                                              | 0.16        | 0.87                                   | 0.90                                   | NA           |
| Ast                      | 0.014                 | $1.1 \times 10^{-3}$ to 0.027                                | 2.14        | 0.033                                  | 0.067                                  | NA           |
| <b>Mic</b>               | <b>0.021</b>          | <b><math>8.2 \times 10^{-3}</math> to <math>0.033</math></b> | <b>3.26</b> | <b><math>1.2 \times 10^{-3}</math></b> | <b><math>6.9 \times 10^{-3}</math></b> | <b>0.030</b> |
| Oli                      | $9.0 \times 10^{-3}$  | $-3.9 \times 10^{-3}$ to 0.022                               | 1.37        | 0.17                                   | 0.24                                   | NA           |
| Opc                      | $3.9 \times 10^{-3}$  | $-8.7 \times 10^{-3}$ to 0.016                               | 0.61        | 0.54                                   | 0.66                                   | NA           |
| <i>APOE</i> $\epsilon 4$ | 0.032                 | 0.011 to 0.054                                               | 3.02        | $2.8 \times 10^{-3}$                   | NA                                     | 0.025        |
| <i>APOE</i> $\epsilon 2$ | -0.045                | -0.087 to $-3.8 \times 10^{-3}$                              | -2.15       | 0.033                                  | NA                                     | 0.011        |

**Supplementary Table 22. Association between cell-type-specific ADPRS and tau in A4 (n=302).** Beta (effect size) corresponds to units changed in flortaucipir PET SUVR (temporal lobe composite) per 1 s.d. increase in ADPRS. ADPRS models (linear regression) were adjusted for *APOE*  $\epsilon 4$ , *APOE*  $\epsilon 2$ , age, sex, and the first three genotype principal components. For the cell-type-specific ADPRS that showed a significant association with the trait (FDR<0.025), variance explained by the PRS was captured by comparing adjusted  $R^2$  between the linear models with and without the given PRS term ( $\Delta R^2$ ). For comparison, the statistics for *APOE*  $\epsilon 4$  and  $\epsilon 2$  from the same model as All-ADPRS (with the same covariates) were shown in the bottom two lines of the table. All p-values are two-sided. To account for multiple comparisons, false discovery rate (FDR) correction was applied across all main tests in A4, and statistically significant results (FDR<0.025) were indicated in bold. (Also see **Fig. 3**).

| Model | Beta  | 95% CI          | t-value | p-value              |
|-------|-------|-----------------|---------|----------------------|
| Ex    | 0.048 | -0.032 to 0.13  | 1.18    | 0.24                 |
| Ast   | 0.013 | -0.067 to 0.093 | 0.31    | 0.76                 |
| Mic   | 0.16  | 0.081 to 0.24   | 3.93    | $1.0 \times 10^{-4}$ |
| Oli   | 0.057 | -0.027 to 0.14  | 1.33    | 0.18                 |

**Supplementary Table 23. Association between cell-type-specific ADPRS and tau in ROSMAP CU subset (n=454).** Beta (effect size) corresponds to units changed in A $\beta$  per 1 s.d. increase in ADPRS. ADPRS models were adjusted for *APOE*  $\epsilon$ 4, *APOE*  $\epsilon$ 2, age at death, sex, genotyping platform, and the first three genotype principal components. All p-values are two-sided and not adjusted for multiple comparisons.



|                                      | A4/LEARN MRI subset (n=1266) |
|--------------------------------------|------------------------------|
| Mean Age, years (SD)                 | 71.5 (4.7)                   |
| Female (%)                           | 753 (59)                     |
| Mean Education, years (SD)           | 16.7 (2.6)                   |
| <i>APOE</i> ε4 carrier (%)           | 609 (48)                     |
| Mean Florbetapir, cortical SUVR (SD) | 1.22 (0.22)                  |
| Mean HV, mm <sup>3</sup> (SD)        | 3774 (417)                   |
| Elevated Aβ (%) <sup>a</sup>         | 849 (67)                     |
| Median MMSE (IQR)                    | 29 (2)                       |
| AD dementia (%)                      | 0 (0)                        |

**Supplementary Table 24. Study Participant Characteristics (A4/LEARN structural MRI subset).** Abbreviations: APOE, apolipoprotein E; HV, hippocampal volume; IQR, interquartile range; MMSE, Mini-Mental State Examination; SD, standard deviation; SUVR, standardized uptake value ratio (whole cerebellar reference). <sup>a</sup>n=1265 with data.

| Model                    | Beta       | 95% CI            | t-value      | p-value                                | FDR                                    | $\Delta R^2$                           |
|--------------------------|------------|-------------------|--------------|----------------------------------------|----------------------------------------|----------------------------------------|
| <b>All</b>               | <b>-33</b> | <b>-52 to -14</b> | <b>-3.48</b> | <b><math>5.3 \times 10^{-4}</math></b> | <b><math>4.9 \times 10^{-3}</math></b> | <b><math>5.9 \times 10^{-3}</math></b> |
| Ex                       | -14        | -34 to 4.8        | -1.47        | 0.14                                   | 0.21                                   | NA                                     |
| In                       | 3.1        | -16 to 22         | 0.32         | 0.75                                   | 0.84                                   | NA                                     |
| Ast                      | -15        | -34 to 4.3        | -1.52        | 0.13                                   | 0.21                                   | NA                                     |
| Mic                      | -15        | -34 to 4.2        | -1.53        | 0.13                                   | 0.21                                   | NA                                     |
| Oli                      | -23        | -42 to -4.1       | -2.39        | 0.017                                  | 0.041                                  | NA                                     |
| Opc                      | -14        | -33 to 4.6        | -1.49        | 0.14                                   | 0.21                                   | NA                                     |
| <i>APOE</i> $\epsilon 4$ | -54        | -86 to -22        | -3.32        | $9.2 \times 10^{-4}$                   | NA                                     | $5.4 \times 10^{-3}$                   |
| <i>APOE</i> $\epsilon 2$ | -24        | -84 to 35         | -0.81        | 0.42                                   | NA                                     | NA                                     |

**Supplementary Table 25. Association between cell-type-specific ADPRS and hippocampal volume (HV) in A4 (n=1,266).** Beta (effect size) corresponds to units changed in HV (mm<sup>3</sup>) per 1 s.d. increase in ADPRS. ADPRS models (linear regression) were adjusted for *APOE*  $\epsilon 4$ , *APOE*  $\epsilon 2$ , age, sex, intracranial volume (ICV), and the first three genotype principal components. For the cell-type-specific ADPRS that showed a significant association with the trait (FDR<0.025), variance explained by the PRS was captured by comparing adjusted R<sup>2</sup> between the linear models with and without the given PRS term ( $\Delta R^2$ ). For comparison, the statistics for *APOE*  $\epsilon 4$  and  $\epsilon 2$  from the same model as All-ADPRS (with the same covariates) were shown in the bottom two lines of the table. All p-values are two-sided. To account for multiple comparisons, false discovery rate (FDR) correction was applied across all main tests in A4, and statistically significant results (FDR<0.025) were indicated in bold. (Also see **Fig. 3**).

| Model                    | Beta                  | 95% CI                         | t-value      | p-value                                | FDR          | $\Delta R^2$                           |
|--------------------------|-----------------------|--------------------------------|--------------|----------------------------------------|--------------|----------------------------------------|
| <b>All</b>               | <b>-0.13</b>          | <b>-0.21 to -0.045</b>         | <b>-3.02</b> | <b><math>2.5 \times 10^{-3}</math></b> | <b>0.010</b> | <b><math>2.3 \times 10^{-3}</math></b> |
| Ex                       | -0.027                | -0.11 to 0.056                 | -0.64        | 0.52                                   | 0.66         | NA                                     |
| In                       | -0.095                | -0.18 to -0.013                | -2.26        | 0.024                                  | 0.051        | NA                                     |
| <b>Ast</b>               | <b>-0.12</b>          | <b>-0.20 to -0.037</b>         | <b>-2.83</b> | <b><math>4.6 \times 10^{-3}</math></b> | <b>0.014</b> | <b><math>2.0 \times 10^{-3}</math></b> |
| Mic                      | -0.088                | -0.17 to $-5.6 \times 10^{-3}$ | -2.10        | 0.036                                  | 0.068        | NA                                     |
| Oli                      | $-2.2 \times 10^{-3}$ | -0.084 to 0.080                | -0.053       | 0.96                                   | 0.96         | NA                                     |
| Opc                      | -0.053                | -0.14 to 0.030                 | -1.26        | 0.21                                   | 0.28         | NA                                     |
| <i>APOE</i> $\epsilon 4$ | -0.26                 | -0.42 to -0.11                 | -3.42        | $6.4 \times 10^{-4}$                   | NA           | $3.0 \times 10^{-3}$                   |
| <i>APOE</i> $\epsilon 2$ | -0.013                | -0.25 to 0.22                  | -0.11        | 0.91                                   | NA           | NA                                     |

**Supplementary Table 26. Association between cell-type-specific ADPRS and Preclinical Alzheimer Cognitive Composite (PACC) in A4 (n=2,918).** Beta (effect size) corresponds to units changed in PACC per 1 s.d. increase in ADPRS. ADPRS models (linear regression) were adjusted for *APOE*  $\epsilon 4$ , *APOE*  $\epsilon 2$ , age, sex, years of education, and the first three genotype principal components. For the cell-type-specific ADPRS that showed a significant association with the trait (FDR<0.025), variance explained by the PRS was captured by comparing adjusted  $R^2$  between the linear models with and without the given PRS term ( $\Delta R^2$ ). For comparison, the statistics for *APOE*  $\epsilon 4$  and  $\epsilon 2$  from the same model as All-ADPRS (with the same covariates) were shown in the bottom two lines of the table. All p-values are two-sided. To account for multiple comparisons, false discovery rate (FDR) correction was applied across all main tests in A4, and statistically significant results (FDR<0.025) were indicated in bold. (Also see **Fig. 3**).

| Phenotype | Cell Type<br>(Genomic Margin) | Beta                 | 95% CI                        | t-value | p-value              |
|-----------|-------------------------------|----------------------|-------------------------------|---------|----------------------|
| A $\beta$ | Ex (10 kb)                    | 8.5 $\times 10^{-3}$ | 2.1 $\times 10^{-3}$ to 0.015 | 2.61    | 9.1 $\times 10^{-3}$ |
| A $\beta$ | Ex (100 kb)                   | 8.6 $\times 10^{-3}$ | 2.2 $\times 10^{-3}$ to 0.015 | 2.62    | 8.9 $\times 10^{-3}$ |
| A $\beta$ | Ast (10 kb)                   | 8.0 $\times 10^{-3}$ | 1.6 $\times 10^{-3}$ to 0.014 | 2.45    | 0.014                |
| A $\beta$ | Ast (100 kb)                  | 9.6 $\times 10^{-3}$ | 3.1 $\times 10^{-3}$ to 0.016 | 2.92    | 3.5 $\times 10^{-3}$ |
| A $\beta$ | Mic (10 kb)                   | 0.015                | 8.2 $\times 10^{-3}$ to 0.021 | 4.48    | 7.8 $\times 10^{-6}$ |
| A $\beta$ | Mic (100 kb)                  | 0.017                | 0.011 to 0.024                | 5.35    | 9.3 $\times 10^{-8}$ |
| A $\beta$ | Oli (10 kb)                   | 9.0 $\times 10^{-3}$ | 2.6 $\times 10^{-3}$ to 0.015 | 2.75    | 5.9 $\times 10^{-3}$ |
| A $\beta$ | Oli (100 kb)                  | 9.9 $\times 10^{-3}$ | 3.5 $\times 10^{-3}$ to 0.016 | 3.03    | 2.5 $\times 10^{-3}$ |
| Tau       | Mic (10 kb)                   | 0.016                | 3.3 $\times 10^{-3}$ to 0.028 | 2.50    | 0.013                |
| Tau       | Mic (100 kb)                  | 0.020                | 7.8 $\times 10^{-3}$ to 0.033 | 3.19    | 1.6 $\times 10^{-3}$ |
| PACC      | Ast (10 kb)                   | -0.11                | -0.20 to -0.031               | -2.69   | 7.2 $\times 10^{-3}$ |
| PACC      | Ast (100 kb)                  | -0.12                | -0.20 to -0.033               | -2.76   | 5.9 $\times 10^{-3}$ |

**Supplementary Table 27. Association between cell-type-specific ADPRS using different genomic margins and AD endophenotypes in A4.** For the significant findings using cell-type-specific ADPRS using  $\pm 30$ kb margins (FDR<0.025 in Fig. 2), we performed sensitivity analyses using cell-type-specific ADPRS using different genomic margins (genes  $\pm 10$ kb or  $\pm 100$ kb). All models (linear regression) were adjusted for *APOE*  $\epsilon 4$ , *APOE*  $\epsilon 2$ , age, sex, years of education (for PACC outcome), and the first three genotype principal components. All p-values are two-sided and not adjusted for multiple comparisons.

| Phenotype | Cell Type | Beta                 | 95% CI                        | t-value | p-value              |
|-----------|-----------|----------------------|-------------------------------|---------|----------------------|
| A $\beta$ | Ex        | 8.6 $\times 10^{-3}$ | 2.2 $\times 10^{-3}$ to 0.015 | 2.63    | 8.6 $\times 10^{-3}$ |
| A $\beta$ | Ast       | 9.7 $\times 10^{-3}$ | 3.3 $\times 10^{-3}$ to 0.016 | 2.96    | 3.1 $\times 10^{-3}$ |
| A $\beta$ | Mic       | 0.017                | 0.011 to 0.024                | 5.31    | 1.2 $\times 10^{-7}$ |
| A $\beta$ | Oli       | 9.9 $\times 10^{-3}$ | 3.5 $\times 10^{-3}$ to 0.016 | 3.02    | 2.6 $\times 10^{-3}$ |
| Tau       | Mic       | 0.023                | 9.9 $\times 10^{-3}$ to 0.036 | 3.49    | 5.6 $\times 10^{-4}$ |
| PACC      | Ast       | -0.12                | -0.20 to -0.036               | -2.83   | 4.7 $\times 10^{-3}$ |

**Supplementary Table 28. Association between cell-type-specific ADPRS and AD endophenotypes in A4, using 10 genotype PCs.** For the significant findings from the A4 main analyses (FDR<0.025 in Fig. 4), we performed sensitivity analyses adjusting for 10 genotype PCs (instead of 3 PCs adjusted in the main analyses). All models (linear regression) were adjusted for *APOE*  $\epsilon$ 4, *APOE*  $\epsilon$ 2, age, sex, years of education (for PACC outcome), and the first three genotype principal components. All p-values are two-sided and not adjusted for multiple comparisons.

| Phenotype | Cell Type | Beta                 | 95% CI                                        | t-value | p-value              | $\Delta R^2$<br>(PRSet) | $\Delta R^2$<br>(PRSCS) |
|-----------|-----------|----------------------|-----------------------------------------------|---------|----------------------|-------------------------|-------------------------|
| A $\beta$ | Ex        | $2.1 \times 10^{-3}$ | $-4.4 \times 10^{-3}$ to $8.5 \times 10^{-3}$ | 0.63    | 0.53                 | NA                      | $1.6 \times 10^{-3}$    |
| A $\beta$ | Ast       | $2.9 \times 10^{-3}$ | $-3.5 \times 10^{-3}$ to $9.4 \times 10^{-3}$ | 0.89    | 0.37                 | NA                      | $2.1 \times 10^{-3}$    |
| A $\beta$ | Mic       | $9.6 \times 10^{-3}$ | $3.2 \times 10^{-3}$ to 0.016                 | 2.94    | $3.3 \times 10^{-3}$ | $2.2 \times 10^{-3}$    | $7.7 \times 10^{-3}$    |
| A $\beta$ | Oli       | $5.2 \times 10^{-3}$ | $-1.2 \times 10^{-3}$ to 0.12                 | 1.60    | 0.11                 | NA                      | $2.3 \times 10^{-3}$    |
| Tau       | Mic       | 0.011                | $-1.8 \times 10^{-3}$ to 0.023                | 1.68    | 0.095                | NA                      | 0.030                   |
| PACC      | Ast       | -0.065               | -0.15 to 0.018                                | -1.54   | 0.12                 | NA                      | $2.0 \times 10^{-3}$    |

**Supplementary Table 29. Association between PRSet-derived ADPRS and AD endophenotypes in A4.** For the significant findings from the A4 main analyses (FDR<0.025 in Fig. 4), we benchmarked our approach against PRSet. For the PRSet-derived ADPRS that showed a nominal association with the trait (uncorrected p<0.05), variance explained by the PRS was captured by comparing adjusted R<sup>2</sup> between the linear models with and without the given PRS term ( $\Delta R^2$ ).  $\Delta R^2$  from the main results (using PRS-CS) were shown for comparison. (see Fig. 4 and Supplementary Tables 18, 22, 25, 26). All models (linear regression) were adjusted for *APOE*  $\epsilon 4$ , *APOE*  $\epsilon 2$ , age, sex, years of education (for PACC outcome), and the first three genotype principal components. All p-values are two-sided and not adjusted for multiple comparisons. All p-values are two-sided and not adjusted for multiple comparisons.

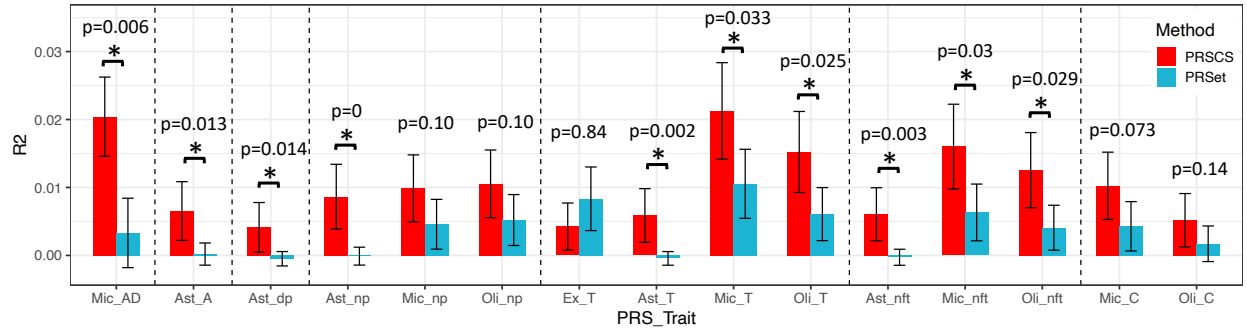

**Supplementary Fig 1.  $\Delta R^2$  of significant main results (ROSMAP, PRS-CS) and PRSet-derived results.** Variance explained by the PRS was captured by comparing adjusted  $R^2$  between the linear models with and without the given PRS term ( $\Delta R^2$ ; Nagelkerke's  $R^2$  was used for the AD dementia logistic regression model [first column]). The main results from this study (red bars) and the results derived with an alternative method (light blue bars) are shown. Error bars indicate bootstrap-estimated standard errors ( $n=1,000$  bootstrap replicates). Empiric p-values, defined as the proportion of bootstrapped PRSet  $\Delta R^2$  greater than the actual PRS-CS  $\Delta R^2$ , were noted above each pair of bar graphs. Asterisks indicate empiric  $p < 0.05$ . Horizontal dashed lines separate between traits. Abbreviations: AD, AD dementia; A, amyloid- $\beta$ ; dp, diffuse plaque; np, neuritic plaque; T, tau; nft, neurofibrillary tangle; C, cognitive decline.

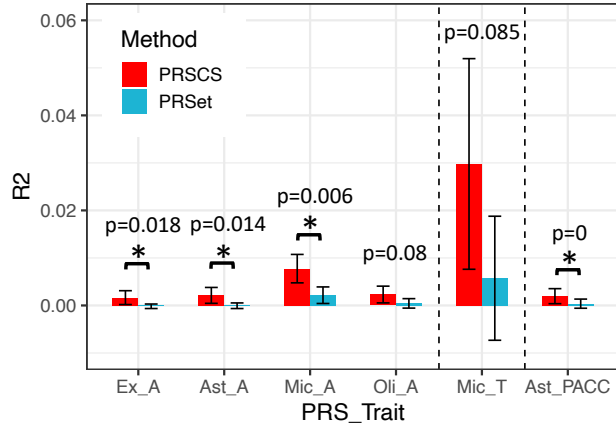

**Supplementary Fig 2.  $\Delta R^2$  of significant main results (A4, PRS-CS) and PRSet-derived results.** Variance explained by the PRS was captured by comparing adjusted  $R^2$  between the linear models with and without the given PRS term ( $\Delta R^2$ ). The main results from this study (red bars) and the results derived with an alternative method (light blue bars) are shown. Error bars indicate bootstrap-estimated standard errors (n=1,000 bootstrap replicates). Empiric p-values, defined as the proportion of bootstrapped PRSet  $\Delta R^2$  greater than the actual PRS-CS  $\Delta R^2$ , were noted above each pair of bar graphs. Asterisks indicate empiric  $p < 0.05$ . Horizontal dashed lines separate between traits. Abbreviations: AD, AD dementia; A, amyloid- $\beta$ ; T, tau; HV, hippocampal volume; PACC, preclinical Alzheimer cognitive composite.
